# Supplementary material for: Quantitative determination of protein molecular weight with an acoustic sensor; significance of specific versus non-specific binding
Source: Royal Society of Chemistry journal article supplement (doi:10.1039/c4an00616j), 2014-01-01
Supplement: c4an00616j1.pdf [file c4an00616j1.pdf]

## Electronic Supplementary Information

### Electronic Supplementary Information

#### Quantitative determination of protein molecular weight with an acoustic sensor; significance of specific versus non-specific binding

Konstantinos Mitsakakis, Achilleas Tsortos, and Electra Gizeli

DOI: 10.1039/b000000x

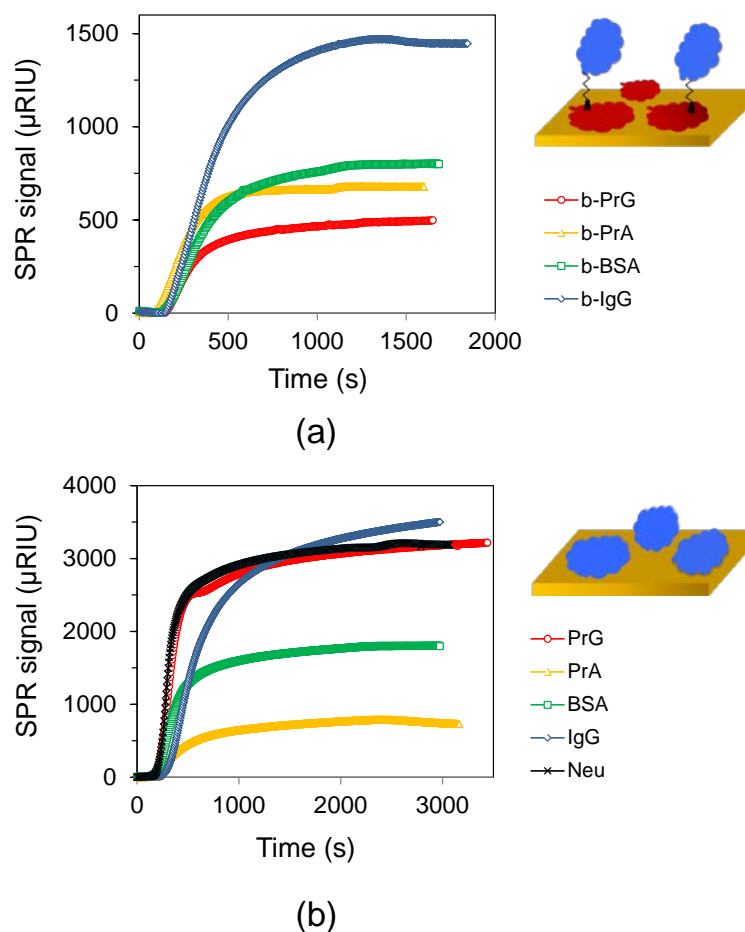

**Figure S-1:** Real-time SPR signal for (a) biotinylated molecules specifically binding on a (preformed) neutravidin (red) layer; (b) non-biotinylated molecules directly adsorbing on gold. (This figure is supporting Fig.2(a) and (b)).

## Electronic Supplementary Information

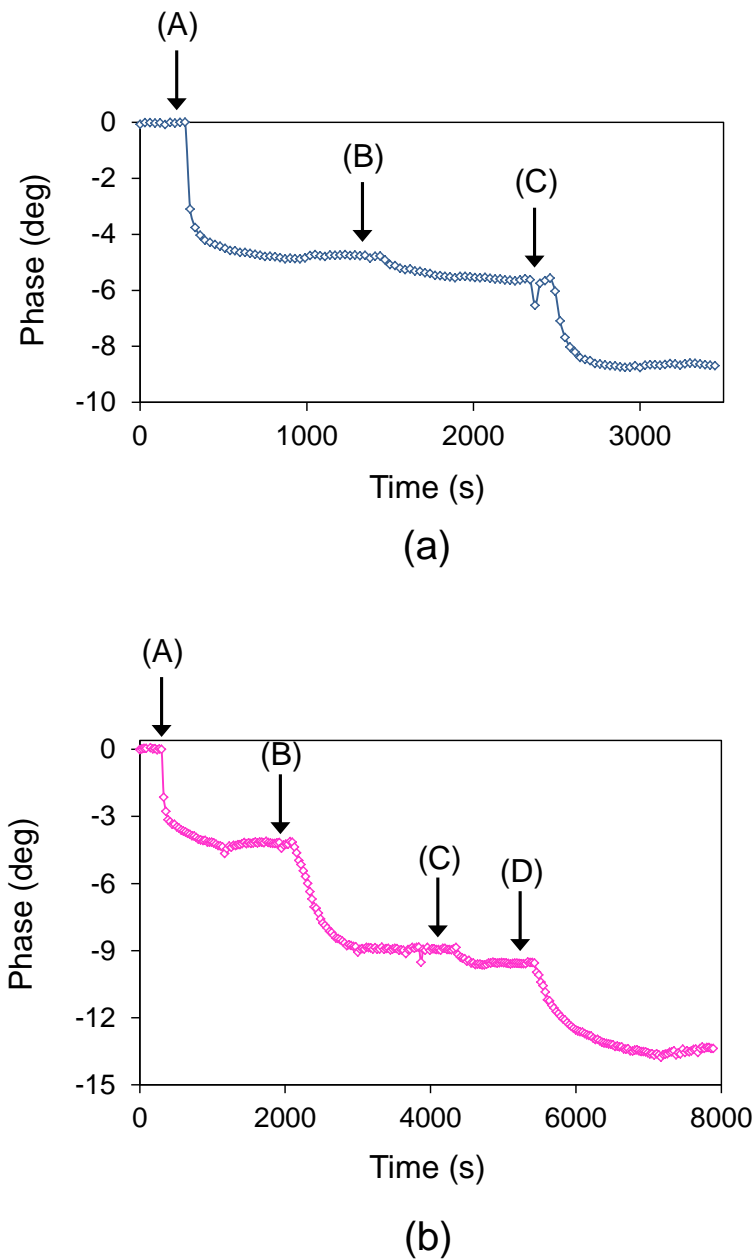

**Figure S-2:** Real-time phase response during (a) the sequential injection of (A) neutravidin; (B) BSA; (C) b-IgG; similar trend is true for the other biotinylated molecules. In (b) the sequential injections are: (A) PrG; (B) antibody (anti-PAPP-A in this case); (C) BSA; (D) PAPP-A. Similar trend is true for the other cardiac markers. (*This figure is supporting Fig.2(a) and (c)*).

## Electronic Supplementary Information

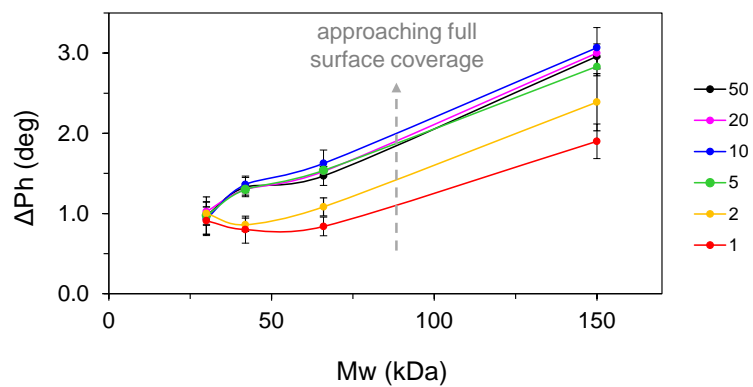

**Figure S-3:** Phase change vs. molecular weight as concentration (in  $\mu g/ml$ ) increases for the specific binding of biotinylated molecules to neutravidin. (*This figure is supporting Fig.6*).
